# Supplementary material
Source: PubMed Central journal article supplement (PMC7027926)
Supplement: NIHMS1549675-supplement-Supplemental_Material.pdf [file NIHMS1549675-supplement-Supplemental_Material.pdf]

**SUPPLEMENTAL MATERIAL**

**Supplementary Table 1. Identification of diagnoses and procedures**

| <b>Comorbidity</b>                          | <b>International Classification of Disease 9.0 Clinical Modification Codes</b>                                         |
|---------------------------------------------|------------------------------------------------------------------------------------------------------------------------|
| Cardiac arrest                              | 427.5                                                                                                                  |
| Coronary angiography                        | 37.22, 37.23, 88.53-88.56                                                                                              |
| Percutaneous coronary intervention          | 00.66, 36.01, 36.02, 36.05, 36.06, 36.07, 88.57                                                                        |
| Intra-aortic balloon pump                   | 37.61                                                                                                                  |
| Percutaneous mechanical circulatory support | 37.68                                                                                                                  |
| Extra-corporeal membrane oxygenation        | 39.65                                                                                                                  |
| Right heart catheterization                 | 37.21, 37.23                                                                                                           |
| Pulmonary artery catheterization            | 204 (Clinical Classification Software code)                                                                            |
| Invasive mechanical ventilation             | 96.7, 96.70, 96.71, 96.72                                                                                              |
| Hemodialysis                                | 39.95                                                                                                                  |
| Acute renal failure                         | 584, 584.5, 584.6, 584.7, 584.8, 584.9                                                                                 |
| Acute respiratory failure                   | 518.81, 518.85, 786.09, 799.1                                                                                          |
| Acute hepatic failure                       | 570.x, 572.2, 573.3, 573.4                                                                                             |
| Acute neurologic failure                    | 293, 293.0, 293.1, 293.8, 293.81-293.84, 293.89, 293.9, 348.1, 780.01,<br>780.09, 89.14, 348.3, 348.30, 348.31, 348.39 |

**Supplementary Table 2. Multivariable regression for proportion of cardiogenic shock in acute myocardial infarction**

| Total cohort<br>(N = 402,290) |                  | Odds ratio         | 95% confidence interval |             | P      |
|-------------------------------|------------------|--------------------|-------------------------|-------------|--------|
|                               |                  |                    | Lower Limit             | Upper Limit |        |
| <b>Hospital region</b>        | <b>Northeast</b> | Reference category |                         |             |        |
|                               | <b>Midwest</b>   | 1.14               | 1.11                    | 1.17        | <0.001 |
|                               | <b>South</b>     | 1.13               | 1.10                    | 1.15        | <0.001 |
|                               | <b>West</b>      | 1.36               | 1.32                    | 1.39        | <0.001 |
| <b>Age groups (years)</b>     | <b>19-49</b>     | Reference category |                         |             |        |
|                               | <b>50-59</b>     | 1.23               | 1.19                    | 1.27        | <0.001 |
|                               | <b>60-69</b>     | 1.19               | 1.15                    | 1.24        | <0.001 |
|                               | <b>70-79</b>     | 1.02               | 0.98                    | 1.06        | 0.31   |
|                               | <b>≥80</b>       | 0.95               | 0.92                    | 0.99        | 0.03   |
| <b>Female sex</b>             |                  | 0.90               | 0.89                    | 0.92        | <0.001 |
| <b>Race</b>                   | <b>White</b>     | Reference category |                         |             |        |
|                               | <b>Black</b>     | 0.71               | 0.69                    | 0.74        | <0.001 |

|                                                         |                                         |                    |      |      |        |
|---------------------------------------------------------|-----------------------------------------|--------------------|------|------|--------|
|                                                         | <b>Others</b>                           | 1.03               | 1.01 | 1.04 | 0.003  |
| <b>Primary payer</b>                                    | <b>Medicare</b>                         | Reference category |      |      |        |
|                                                         | <b>Medicaid</b>                         | 1.24               | 1.20 | 1.29 | <0.001 |
|                                                         | <b>Private</b>                          | 1.00               | 0.98 | 1.02 | 0.92   |
|                                                         | <b>Uninsured</b>                        | 1.26               | 1.22 | 1.31 | <0.001 |
|                                                         | <b>No Charge</b>                        | 1.04               | 0.93 | 1.17 | 0.45   |
|                                                         | <b>Others</b>                           | 1.07               | 1.02 | 1.13 | 0.007  |
| <b>Quartile of median household income for zip code</b> | <b>0-25<sup>th</sup></b>                | Reference category |      |      |        |
|                                                         | <b>26<sup>th</sup>-50<sup>th</sup></b>  | 0.99               | 0.97 | 1.01 | 0.43   |
|                                                         | <b>51<sup>st</sup>-75<sup>th</sup></b>  | 1.01               | 0.99 | 1.03 | 0.34   |
|                                                         | <b>75<sup>th</sup>-100<sup>th</sup></b> | 1.03               | 1.01 | 1.05 | 0.011  |
| <b>Hospital Location / Teaching Status</b>              | <b>Rural</b>                            | Reference category |      |      |        |
|                                                         | <b>Urban Non-Teaching</b>               | 1.55               | 1.51 | 1.60 | <0.001 |
|                                                         | <b>Urban Teaching</b>                   | 1.84               | 1.79 | 1.89 | <0.001 |
| <b>Hospital Bedsize</b>                                 | <b>Small</b>                            | Reference category |      |      |        |
|                                                         | <b>Medium</b>                           | 1.22               | 1.19 | 1.26 | <0.001 |
|                                                         | <b>Large</b>                            | 1.52               | 1.48 | 1.56 | <0.001 |
| <b>Charlson Comorbidity</b>                             | <b>0-3</b>                              | Reference category |      |      |        |

|              |             |                    |      |        |        |
|--------------|-------------|--------------------|------|--------|--------|
| <b>Index</b> | <b>4-6</b>  | 2.15               | 2.09 | 2.20   | <0.001 |
|              | $\geq 7$    | 2.08               | 2.02 | 2.15   | <0.001 |
| <b>Year</b>  | <b>2000</b> | Reference category |      |        |        |
|              | <b>2001</b> | 0.97               | 0.93 | 1.01   | 0.13   |
|              | <b>2002</b> | 1.03               | 0.99 | 1.08   | 0.13   |
|              | <b>2003</b> | 1.04               | 1.00 | 1.08   | 0.06   |
|              | <b>2004</b> | 1.04               | 1.00 | 1.08   | 0.08   |
|              | <b>2005</b> | 1.07               | 1.03 | 1.12   | 0.001  |
|              | <b>2006</b> | 1.11               | 1.06 | 1.16   | <0.001 |
|              | <b>2007</b> | 1.17               | 1.12 | 1.22   | <0.001 |
|              | <b>2008</b> | 1.21               | 1.16 | 1.26   | <0.001 |
|              | <b>2009</b> | 1.29               | 1.24 | 1.35   | <0.001 |
|              | <b>2010</b> | 1.31               | 1.25 | 1.36   | <0.001 |
|              | <b>2011</b> | 1.42               | 1.36 | 1.48   | <0.001 |
|              | <b>2012</b> | 1.38               | 1.32 | 1.44   | <0.001 |
|              | <b>2013</b> | 1.40               | 1.35 | 1.46   | <0.001 |
|              | <b>2014</b> | 1.53               | 1.47 | 1.59   | <0.001 |
| <b>2015</b>  | 1.48        | 1.42               | 1.55 | <0.001 |        |

|  |             |      |      |      |        |
|--|-------------|------|------|------|--------|
|  | <b>2016</b> | 1.50 | 1.45 | 1.55 | <0.001 |
|--|-------------|------|------|------|--------|
